# Supplementary material for: Identification of a pathogen causing fruiting body rot of Sanghuangporus vaninii
Source: PeerJ. 2023 Sep 4;11:e15983. doi: 10.7717/peerj.15983 (PMC10484203; doi:10.7717/peerj.15983)
Supplement: Supplemental Information 2 — The diameters of T. virens and S. vaninii on the single plates and the semi diameters of two fungi on the dual-culture plates. These data were used for statistical analysis to obtain the inhibition ratio. [file peerj-11-15983-s002.xlsx]

## Sheet: Sheet1
		T	5 °C	15 °C	25 °C	30 °C	35 °C		T	5 °C	15 °C	25 °C	30 °C	35 °C
Diameter	T. virens	1	0	46	58	47	10		Diameter	0	47.3333	57.6667	49.3333	9.66667
		2	0	46	60	51	9		SD	0	2.3094	2.51661	2.08167	0.57735
		3	0	50	55	50	10
		average	0	47.3333	57.6667	49.3333	9.66667
	Diameter	SD	0	2.3094	2.51661	2.08167	0.57735
	S. vaninii	1		75	80	83
		2		70	80	85
		3		70	70	85
		average		71.6667	76.6667	84.3333
semidiameter	Dual-culture test（T. virens ）	1		60	62	63
		2		55	60	62
		3		62	60	62
		average		59	60.6667	62.3333
	Dual-culture test（S. vaninii）	1		34	22	32
		2		34	21	32
		3		35	18	34
		average		34.3333	20.3333	32.6667
	Dual-culture test（overlap）	1		15	16	23
		2		18	15	17
		3		15	7	10
		average		16	12.6667	16.6667
		T	15 °C	25 °C	30 °C					T	15 °C	25 °C	30 °C
	S. vaninii	1	36	40	42					average	55.2764	79.0698	65.272
		2	36	40	42					SD	1.74075	2.7907	1.44941
		3	35	35	43
		average	35.6667	38.3333	42.3333
	Dual-culture test（S. vaninii）	1	17	11	16
		2	17	10	16
		3	18	9	17
		average	17.3333	10	16.3333
		T	15 °C	25 °C	30 °C
	Inhibition	1	56.2814	76.2791	66.1088
		2	56.2814	79.0698	66.1088
		3	53.2663	81.8605	63.5983
		average	55.2764	79.0698	65.272
		SD	1.74075	2.7907	1.44941
